# Supplementary material for: Consumption of Foods Derived from Subsidized Crops Remains Associated with Cardiometabolic Risk: An Update on the Evidence Using the National Health and Nutrition Examination Survey 2009–2014
Source: MDPI journal article supplement (doi:10.3390/nu12113244), 2020-10-23
Supplement: s1 [file s1]

# Supplemental Tables and Figures

Supplemental Figure S1

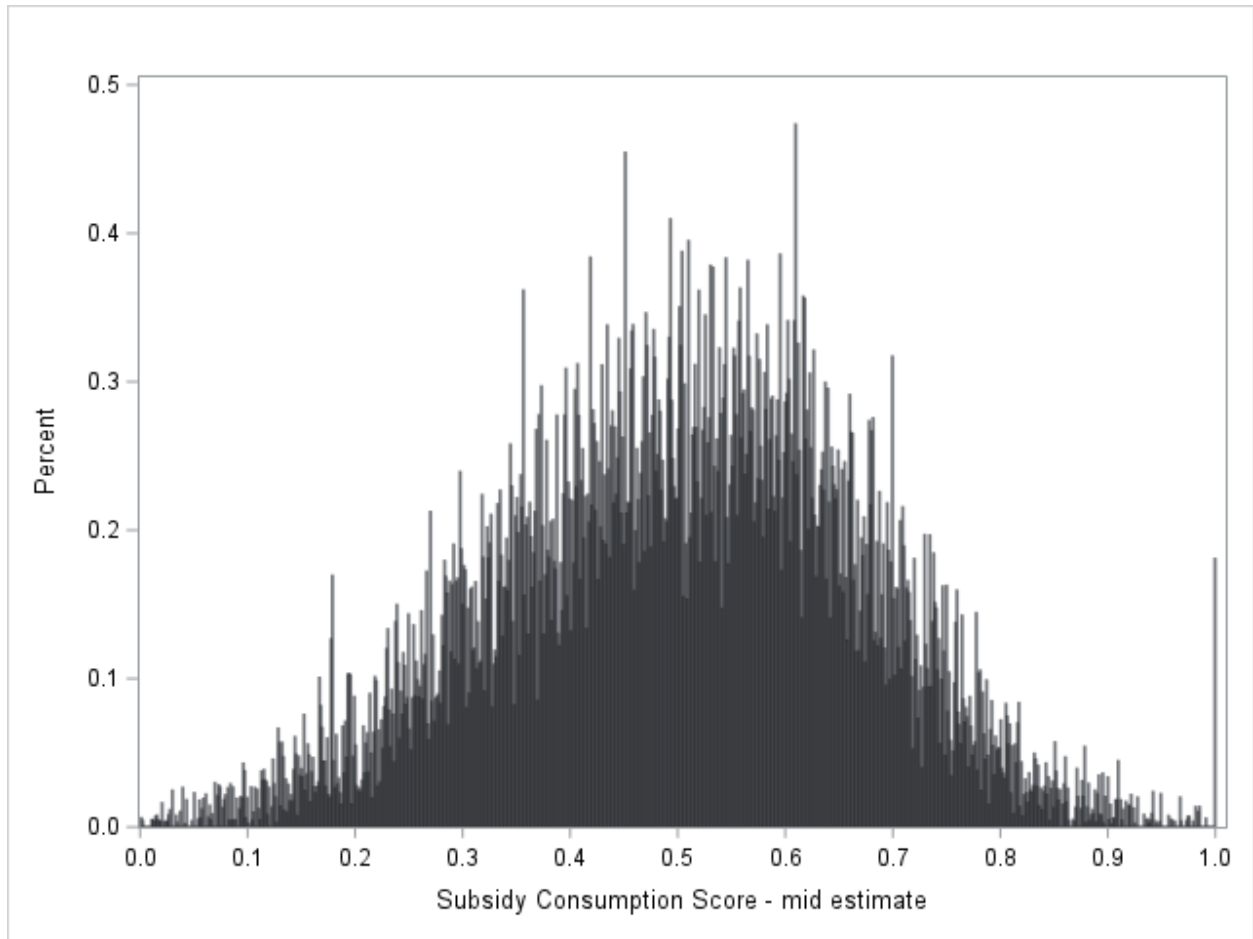

Supplemental Figure S1. Weighted distribution of subsidy score.

## Supplemental Figure S2

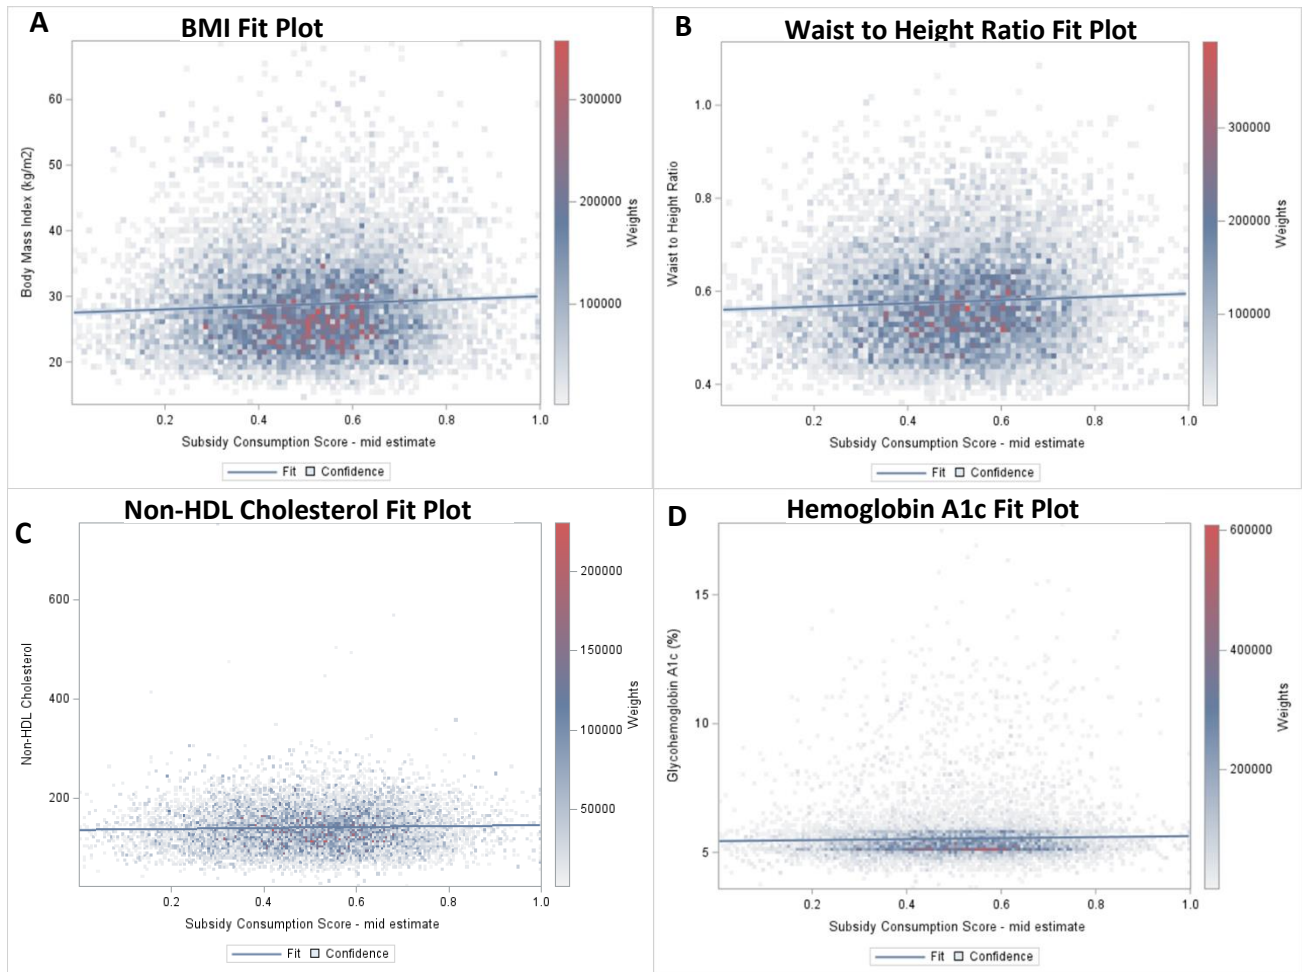

**Supplemental Figure S2.** Association between continuous subsidy score and BMI (2A), waist to height ratio (2B), non-HDL cholesterol (2C) and hemoglobin A1c (2D).

**Supplemental Table S1.** Cardiometabolic risk factors by subsidy score quartiles, National Health and Nutrition Examination Survey from 2009-2014

| Variable                               | Overall Mean         | Q1                    | Q2                   | Q3                   | Q4                   | P-value |
|----------------------------------------|----------------------|-----------------------|----------------------|----------------------|----------------------|---------|
| Body Mass Index (kg/m <sup>2</sup> )   | 28.8 (28.6, 29.1)    | 28.6 (28.3, 28.9)     | 29.0 (28.6, 29.3)    | 29.3 (28.8, 29.8)    | 29.4 (29.0, 29.8)    | 0.0015  |
| Ratio of waist circumference to height | 0.578 (0.574-0.582)  | 0.572 (0.567-0.577)   | 0.578 (0.573-0.583)  | 0.586 (0.578-0.593)  | 0.583 (0.577-0.589)  | 0.0002  |
| SBP, mm Hg                             | 118.8 (118.2-119.3)  | 118.8 (118.2 - 119.4) | 119.57(119.0-120.5)  | 118.4 (117.5-119.4)  | 119.1 (118.1-120.1)  | 0.052   |
| DBP, mm Hg                             | 71.3 (70.7-71.8)     | 71.3 (70.8-71.9)      | 71.8 (71.1-72.6)     | 71.7 (70.7-72.6)     | 72.1 (71.1 - 73.1)   | 0.40    |
| Non-HDL cholesterol level, mg/dL       | 140.8 (139.5, 142.0) | 140.5 (138.8, 142.1)  | 140.3 (138.0, 142.6) | 143.8 (141.5, 146.1) | 144.9 (142.4, 147.4) | 0.0017  |
| Glycated hemoglobin level, %           | 5.54 (5.52-5.56)     | 5.52 (5.48, 5.55)     | 5.55 (5.51, 5.59)    | 5.58 (5.53, 5.63)    | 5.60 (5.55, 5.64)    | 0.01    |

**Supplemental Table S1.** Subsidy score quartiles were defined as follows using cutoffs from previous analysis of 2001-2006 data: Q1 is 0.00-0.47, Q2 is 0.48-0.57, Q3 is 0.58-0.65, and Q4 is 0.66-1. Adjusted for sex, age, race/ethnicity, highest education level, poverty-income ratio, smoking status, participation in moderate to vigorous physical activity and total daily caloric intake with missing data excluded from model.

**Supplemental Table S2.** Adjusted prevalence ratio of cardiometabolic risk factors by subsidy score quartiles, National Health and Nutrition Examination Survey from 2009-2014

| Subsidy Score | Obesity                  | Abdominal Adiposity      | Hypertension      | Dyslipidemia      | Dysglycemia              |
|---------------|--------------------------|--------------------------|-------------------|-------------------|--------------------------|
| Q1            | 1                        | 1                        | 1                 | 1                 | 1                        |
| Q2            | <b>1.17 (1.00, 1.36)</b> | 1.10 (0.95, 1.27)        | 1.10 (0.95, 1.27) | 0.86 (0.73, 1.01) | 1.09 (0.95, 1.26)        |
| Q3            | <b>1.22 (1.00, 1.48)</b> | <b>1.25 (1.06, 1.48)</b> | 0.99 (0.84, 1.18) | 1.09 (0.93, 1.28) | 1.17 (0.95, 1.42)        |
| Q4            | <b>1.27 (1.09, 1.47)</b> | <b>1.19 (1.01, 1.41)</b> | 1.08 (0.92, 1.26) | 1.03 (0.86, 1.24) | <b>1.32 (1.13, 1.54)</b> |

**Supplemental Table S2.** Subsidy score quartiles were defined as follows: Q1 is 0.00-0.47, Q2 is 0.48-0.57, Q3 is 0.58-0.65, and Q4 is 0.66-1.00. Obesity was defined as body mass index of at least 30 kg/m<sup>2</sup>. Abdominal adiposity was defined as a ratio of waist circumference to height of at least 0.59. Hypertension was defined as diagnosed (self-reported) or undiagnosed (no self-reported diagnosis and SBP≥140 mm Hg or DBP≥90 mm Hg) or currently taking antihypertensive medication. Dyslipidemia was defined as diagnosed (self-reported) or undiagnosed (no self-reported diagnosis and non-HDL cholesterol level ≥160 mg/dL) dyslipidemia or currently taking anticholesterolemia medication. Dysglycemia was defined as self-reported diabetes diagnosis or hemoglobin A1c level of at least 5.7%. Individuals with missing data were excluded from the models. Model adjusted for sex, age, race/ethnicity, educational attainment, poverty income ratio, smoking status, moderate and vigorous leisure time physical activity and total caloric intake.
